# Supplementary material
Source: HighWire-hosted journal article supplement (https://jnm.snmjournals.org/highwire/filestream/94453/field_highwire_adjunct_files/0/120378_Supplemenatal_Data.pdf)
Supplement: 120378_Supplemenatal_Data.pdf [file 120378_Supplemenatal_Data.pdf]

## Supplemental Data

In addition to testing for a correlation between *left* hemisphere A $\beta$  load and verbal memory, it was tested if *right* hemisphere A $\beta$  load also correlated with verbal memory. A partial correlational analysis was performed (controlling for sex and age) and revealed that the correlation failed to reach significance ( $r = -0.29$ ,  $p = 0.1$ ; one-tailed).

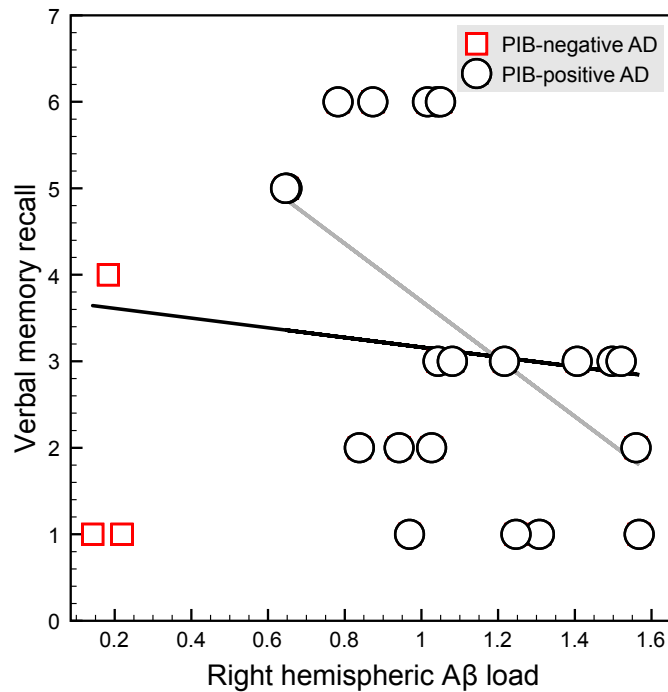

Supplemental Figure 1. Scatterplot depicting individual values of composite estimates of right hemispheric neocortical A $\beta$  load ( $BP_{ND}$ ; x-axis; see Methods for details) and verbal memory recall performance (y-axis; numbers of words recalled out of 10), including linear fit for the entire group of patients (black line) and PIB-positive AD patients (gray line).
